# Supplementary material for: Pan-Cancer Landscape of NEIL3 in Tumor Microenvironment: A Promising Predictor for Chemotherapy and Immunotherapy
Source: MDPI journal article supplement (doi:10.3390/cancers15010109), 2022-12-24
Supplement: s1 [file s1]

A

Enrichment plot KEGG terms

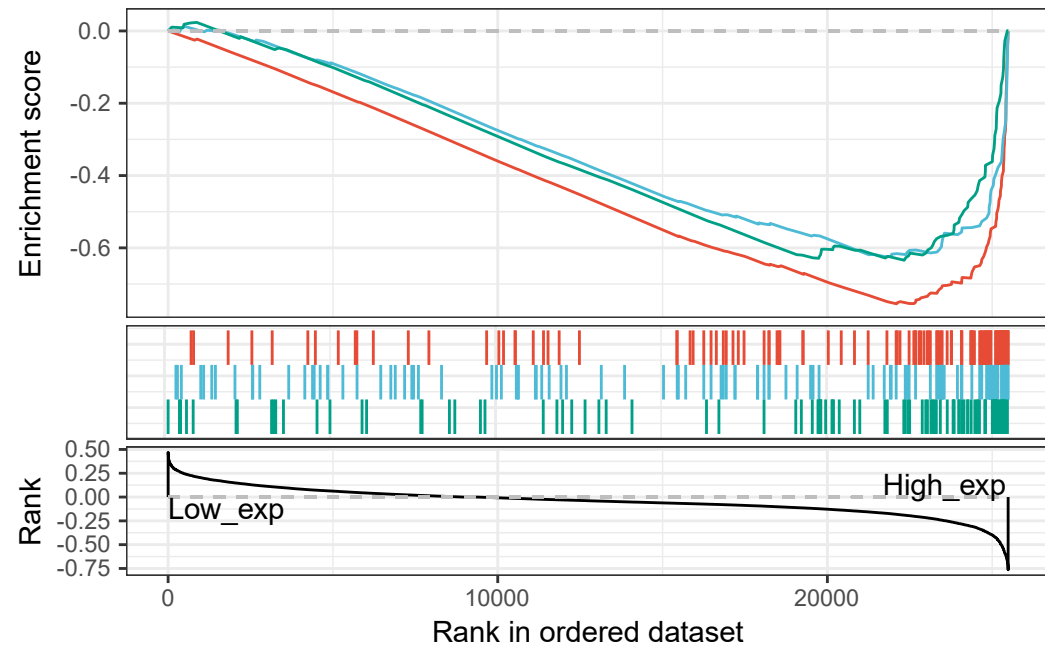

Term

CELL\_CYCLE  
ES=-0.76,NES=-2.4,P=0,FDR=0

OOCYTE\_MEIOSIS  
ES=-0.63,NES=-2.3,P=0,FDR=0

PYRIMIDINE\_METABOLISM  
ES=-0.64,NES=-2.2,P=0,FDR=0

B

Enrichment plot KEGG terms

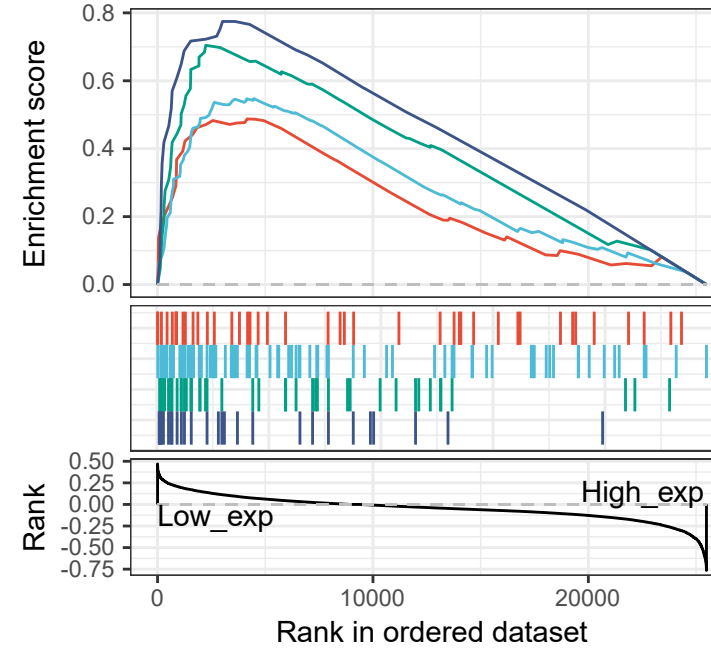

Term

ALDOSTERONE\_REGULATED\_SODIUM\_REABSORPTION  
ES=0.49,NES=1.7,P=0.0097,FDR=0.3

HEMATOPOIETIC\_CELL\_LINEAGE  
ES=0.55,NES=1.7,P=0.028,FDR=0.26

INTERSTITIAL\_IMMUNE\_NETWORK\_FOR\_IGA\_PRODUCTION  
ES=0.7,NES=1.9,P=0.013,FDR=0.11

ASTHMA  
ES=0.77,NES=1.9,P=0.0075,FDR=0.082

C

Enrichment plot HALLMARK terms

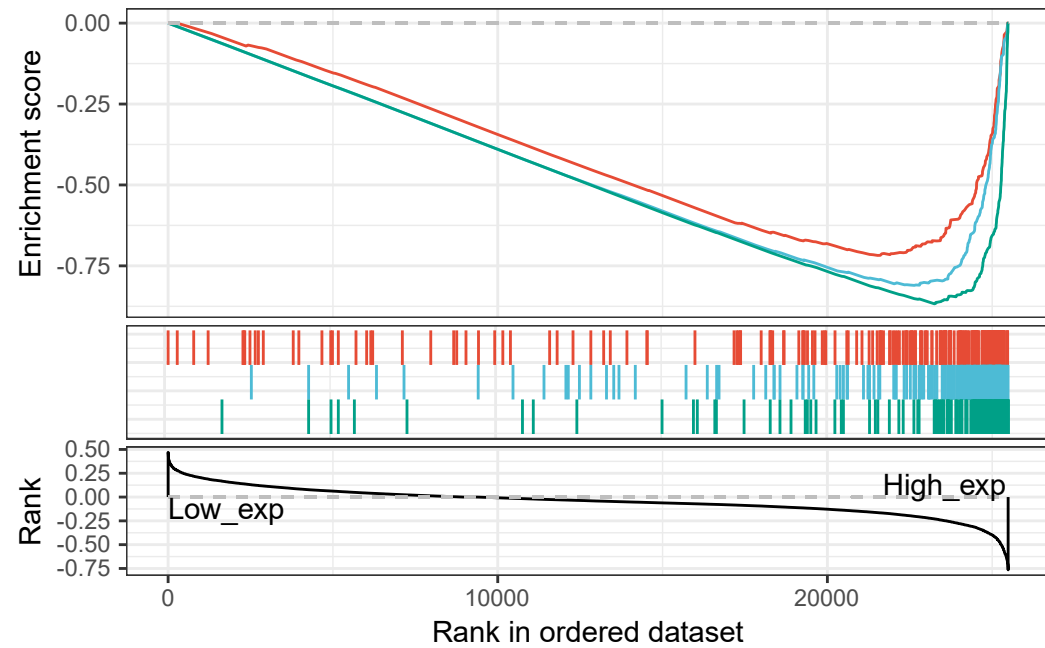

Term

MTORC1\_SIGNALING  
ES=-0.72,NES=-2.5,P=0,FDR=0

MYC\_TARGETS\_V1  
ES=-0.81,NES=-2.3,P=0,FDR=0

E2F\_TARGETS  
ES=-0.87,NES=-2.3,P=0,FDR=0

D

Enrichment plot HALLMARK terms

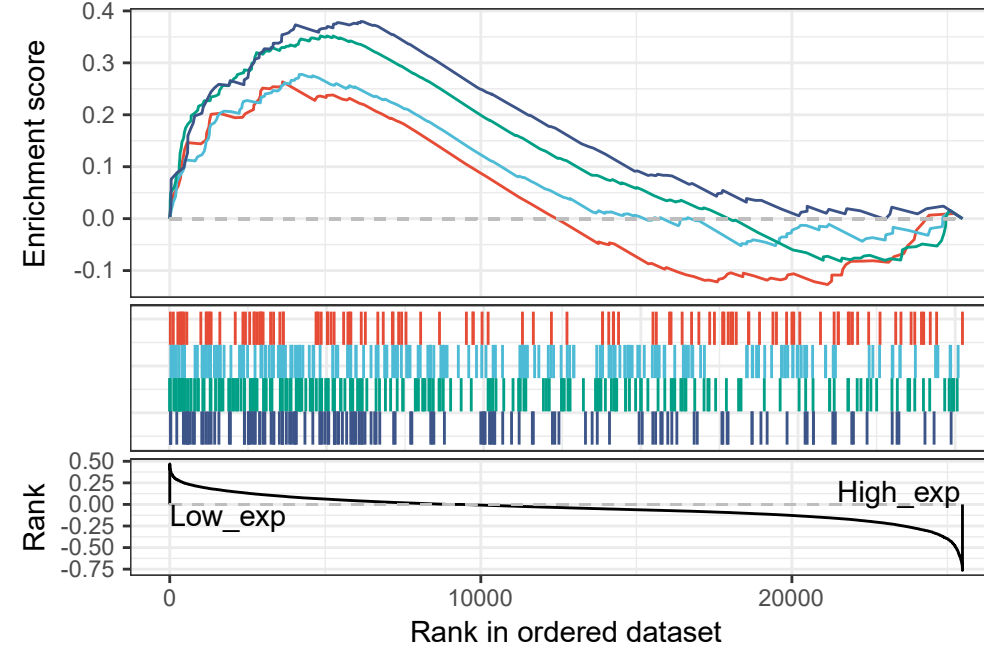

Term

BILE\_ACID\_METABOLISM  
ES=0.26,NES=1.1,P=0.35,FDR=1

KRAS\_SIGNALING\_DN  
ES=0.28,NES=1.2,P=0.13,FDR=0.81

MYOGENESIS  
ES=0.35,NES=1.4,P=0.086,FDR=0.63

COAGULATION  
ES=0.38,NES=1.4,P=0.11,FDR=1
