# Supplementary material for: Pan-Cancer Landscape of NEIL3 in Tumor Microenvironment: A Promising Predictor for Chemotherapy and Immunotherapy
Source: MDPI journal article supplement (doi:10.3390/cancers15010109), 2022-12-24
Supplement: s1 [file s1]

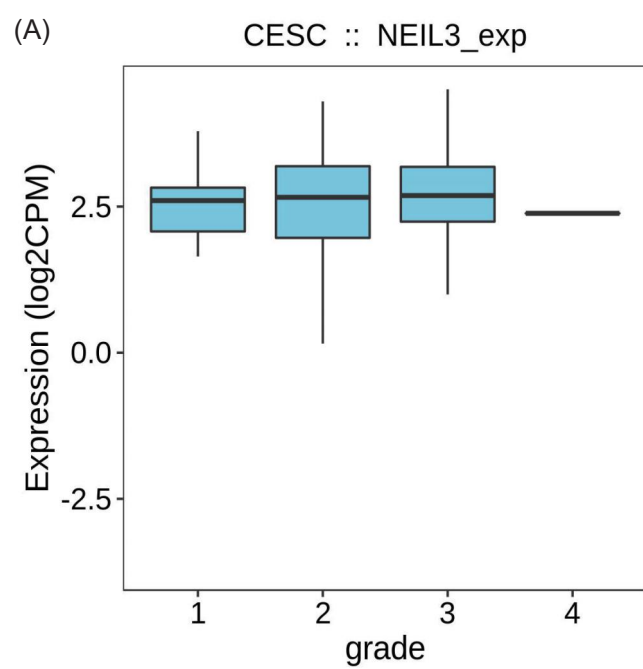

Spearman: rho=0.036, p=0.553

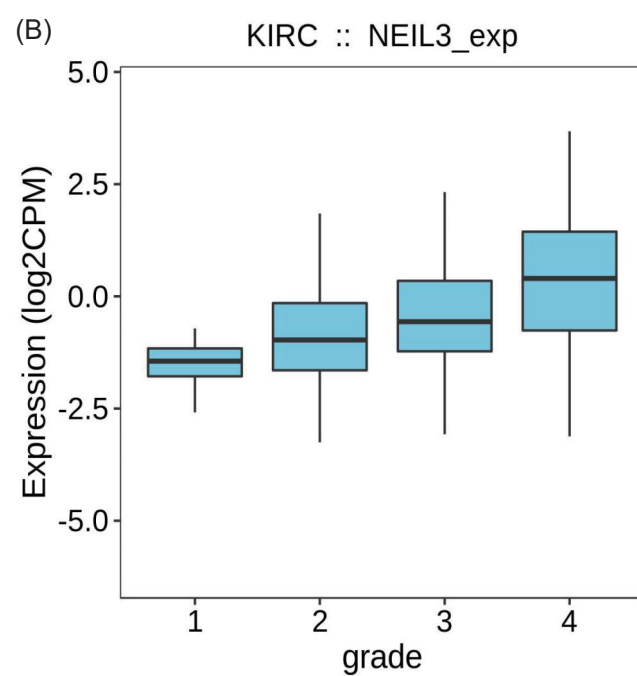

Spearman: rho=0.327, p=1.53e-14

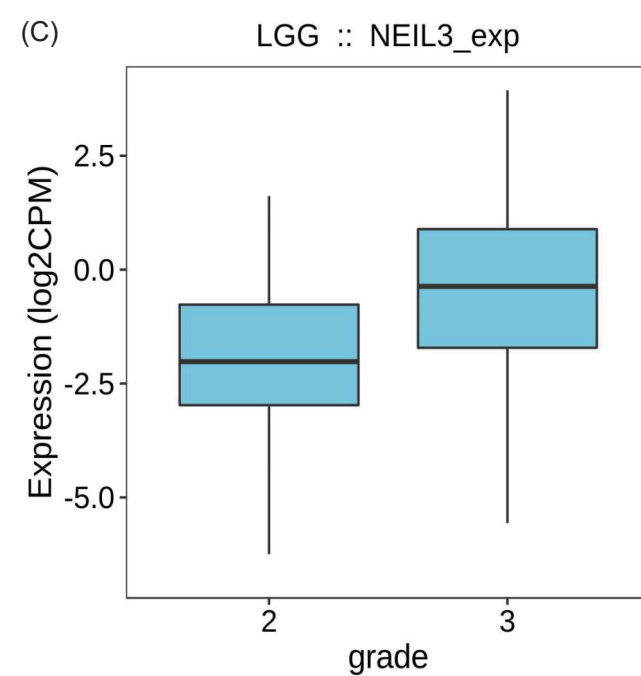

Spearman: rho=0.385, p=1.28e-19

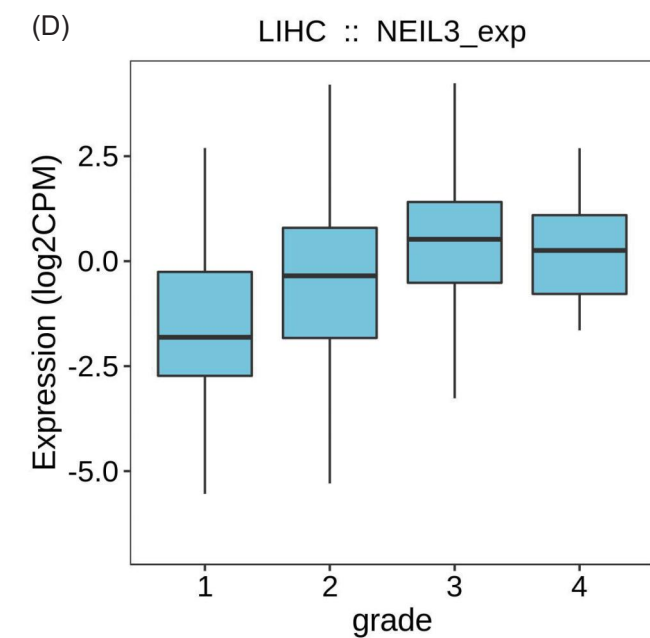

Spearman: rho=0.322, p=2.96e-10

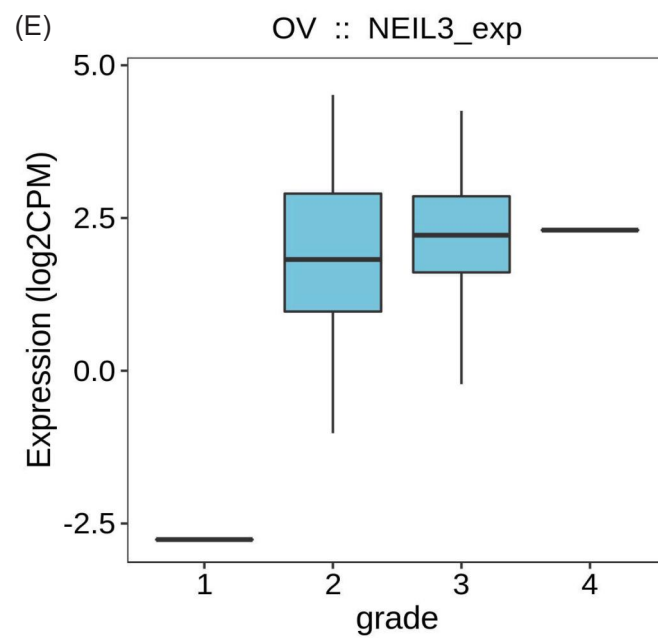

Spearman: rho=0.12, p=0.0396

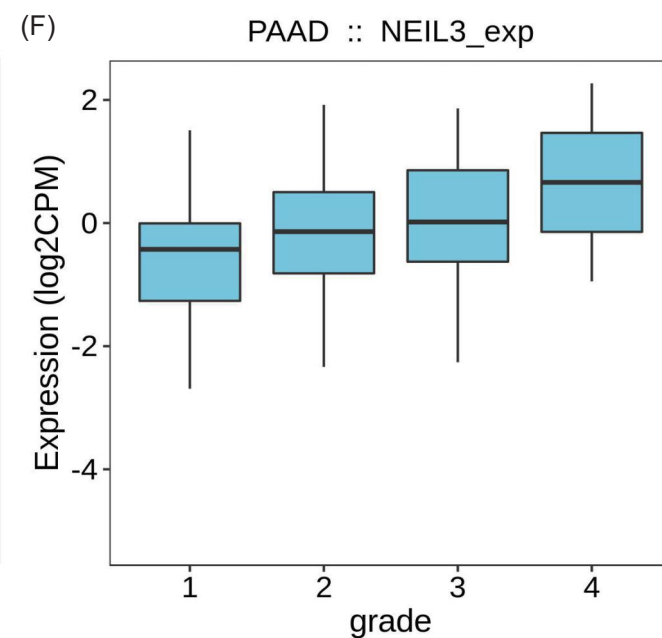

Spearman: rho=0.2, p=0.00774

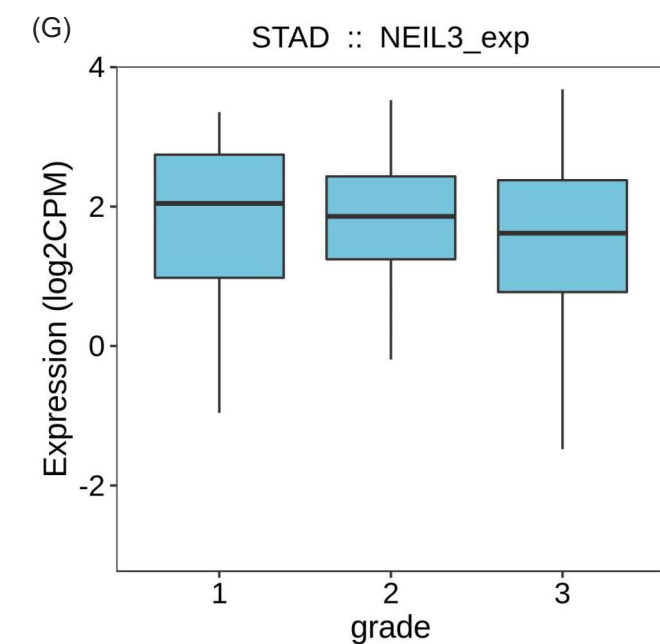

Spearman: rho=-0.123, p=0.0128

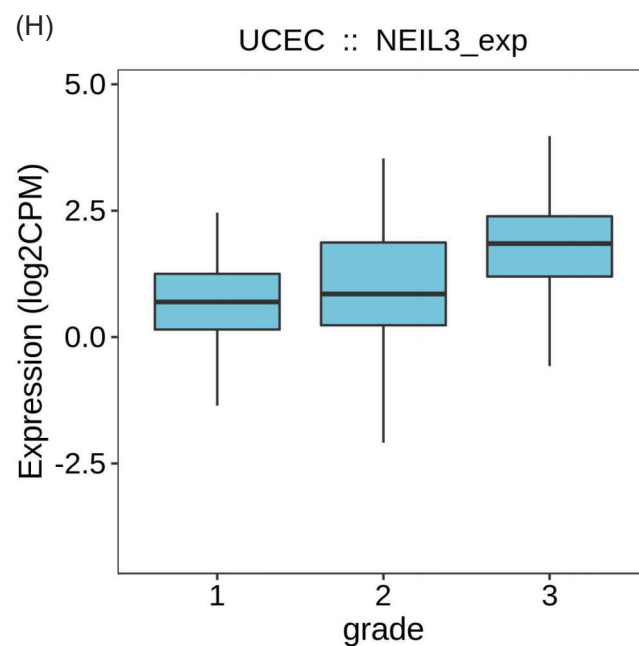

Spearman: rho=0.416, p=9.97e-24

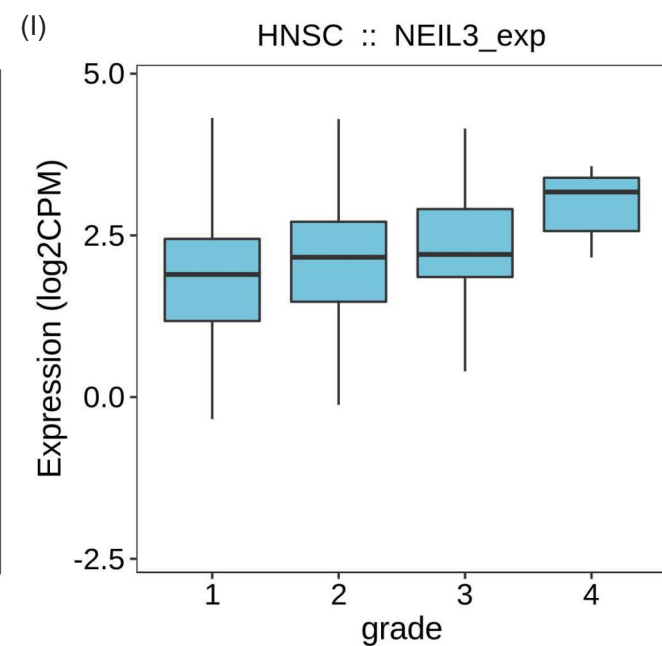

Spearman: rho=0.17, p=0.000138
