# Supplementary material for: Pan-Cancer Landscape of NEIL3 in Tumor Microenvironment: A Promising Predictor for Chemotherapy and Immunotherapy
Source: MDPI journal article supplement (doi:10.3390/cancers15010109), 2022-12-24

(A)

|      | HR                | P Value    |
|------|-------------------|------------|
| ACC  | 1.39(1.22 ~ 1.58) | 6.4e-07*** |
| BLCA | 1.04(1.01 ~ 1.06) | 5.7e-03**  |
| BRCA | 1.01(0.97 ~ 1.04) | 6.6e-01    |
| CESC | 1.03(0.98 ~ 1.09) | 2.7e-01    |
| CHOL | 1.33(0.91 ~ 1.96) | 1.4e-01    |
| COAD | 0.97(0.9 ~ 1.04)  | 3.5e-01    |
| DLBC | 0.95(0.77 ~ 1.19) | 6.7e-01    |
| ESCA | 0.98(0.92 ~ 1.03) | 4.3e-01    |
| GBM  | 1.03(0.97 ~ 1.08) | 3.6e-01    |
| HNSC | 1.02(0.99 ~ 1.04) | 2.7e-01    |
| KICH | 2.03(1.49 ~ 2.76) | 8.0e-06*** |
| KIRC | 1.11(1.06 ~ 1.15) | 1.9e-07*** |
| KIRP | 1.12(1.07 ~ 1.18) | 1.8e-06*** |
| LAML | 1(0.98 ~ 1.02)    | 8.1e-01    |
| LGG  | 1.17(1.12 ~ 1.22) | 4.3e-12*** |
| LIHC | 1.15(1.1 ~ 1.2)   | 2.9e-09*** |
| LUAD | 1.02(1.01 ~ 1.03) | 1.9e-03**  |
| LUSC | 1(0.98 ~ 1.02)    | 9.0e-01    |
| MESO | 1.24(1.15 ~ 1.34) | 3.8e-08*** |
| OV   | 1(0.96 ~ 1.04)    | 8.7e-01    |
| PAAD | 1.43(1.17 ~ 1.74) | 3.5e-04*** |
| PCPG | 2.95(0.99 ~ 8.74) | 5.1e-02    |
| PRAD | 1.69(1.3 ~ 2.18)  | 6.5e-05*** |
| READ | 0.96(0.81 ~ 1.13) | 6.0e-01    |
| SARC | 1(0.97 ~ 1.04)    | 7.8e-01    |
| SKCM | 1.01(0.97 ~ 1.06) | 5.9e-01    |
| STAD | 0.98(0.91 ~ 1.05) | 5.2e-01    |
| TGCT | 0.86(0.6 ~ 1.22)  | 3.9e-01    |
| THCA | 1.8(0.8 ~ 4.06)   | 1.5e-01    |
| THYM | 0.94(0.89 ~ 0.99) | 2.1e-02*   |
| UCEC | 1.05(0.99 ~ 1.11) | 7.9e-02    |
| UCS  | 1.02(0.95 ~ 1.09) | 5.9e-01    |
| UVM  | 4.03(2 ~ 8.13)    | 9.8e-05*** |

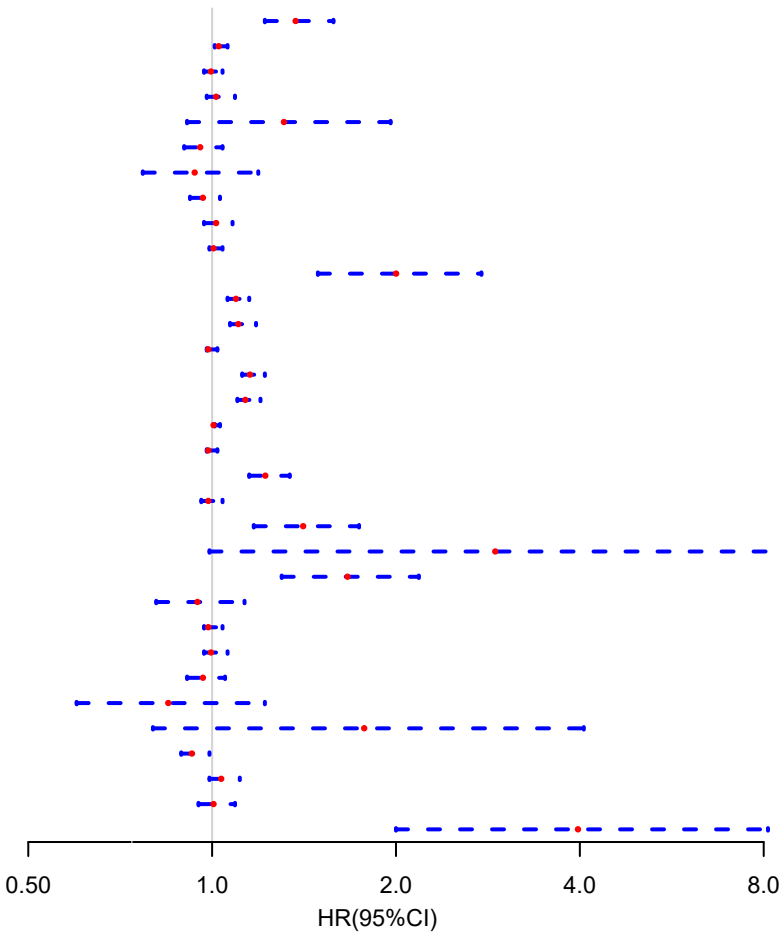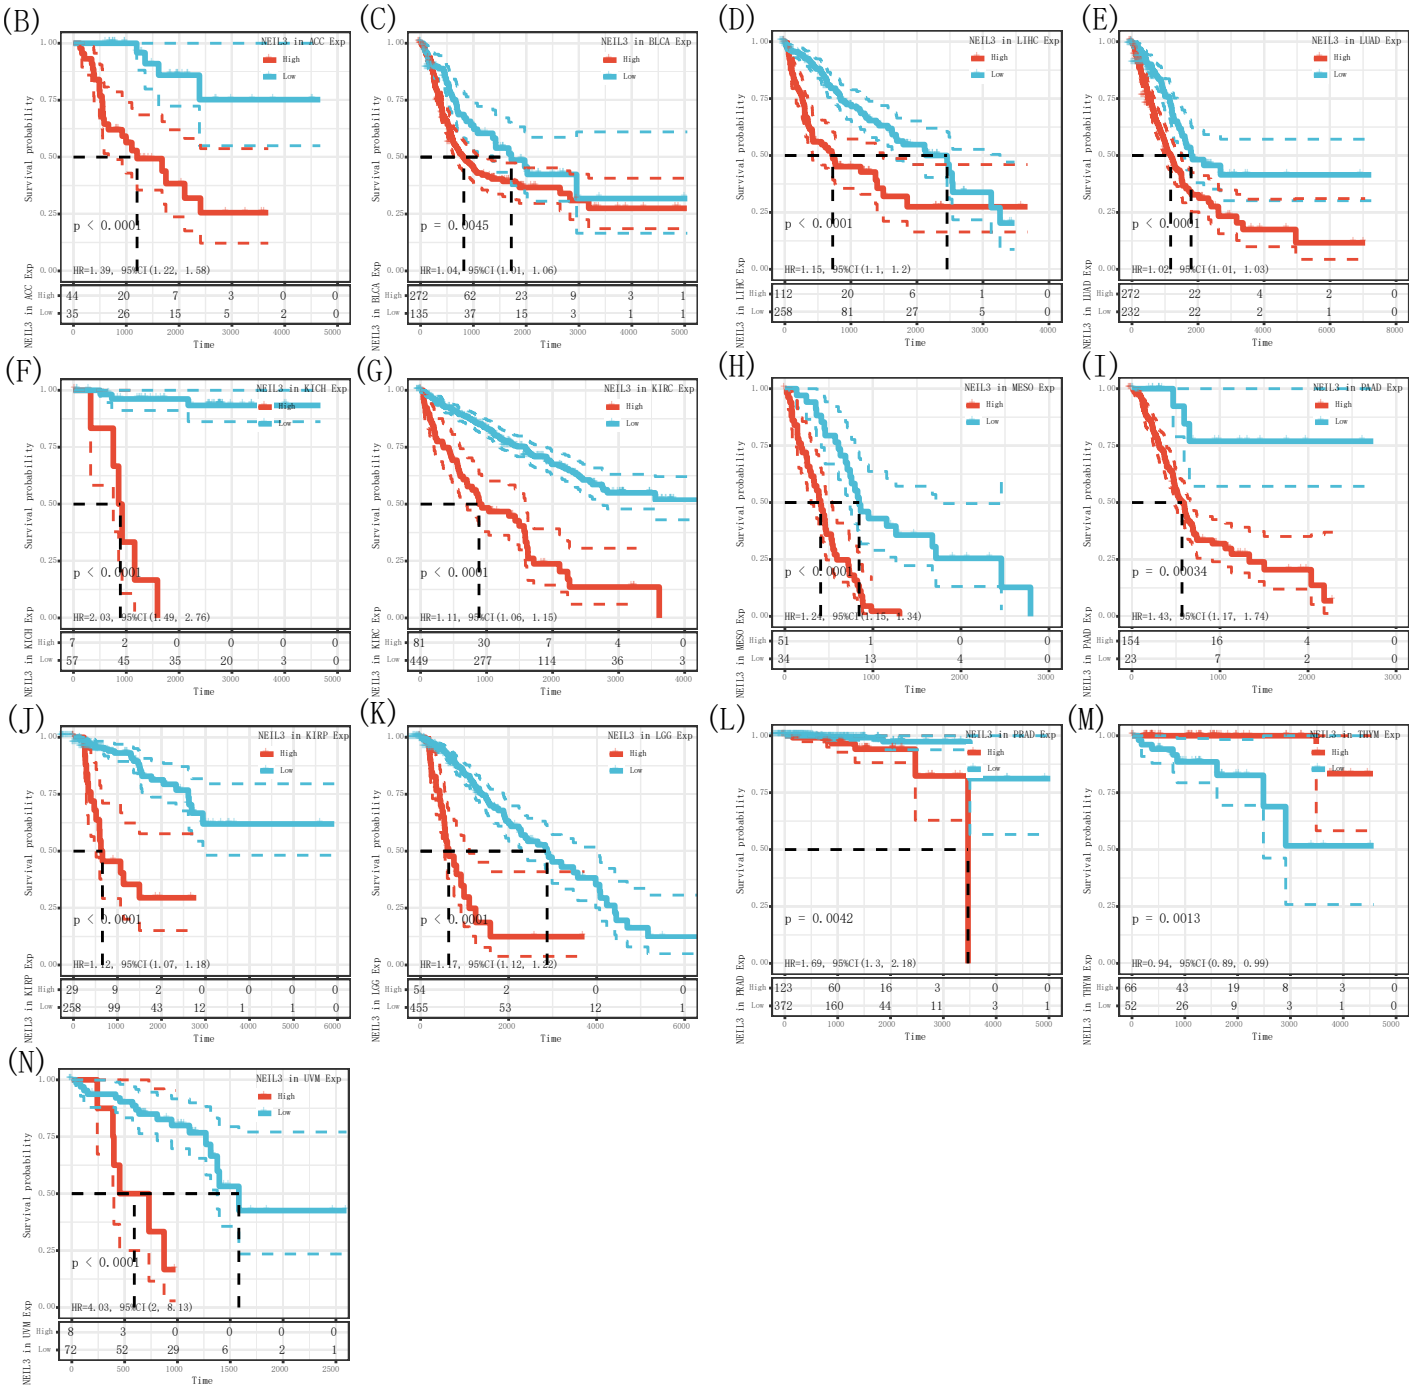

Supplement: s1 [file s1]
