# Supplementary material for: Pan-Cancer Landscape of NEIL3 in Tumor Microenvironment: A Promising Predictor for Chemotherapy and Immunotherapy
Source: MDPI journal article supplement (doi:10.3390/cancers15010109), 2022-12-24

**A** Immunoinhibitor

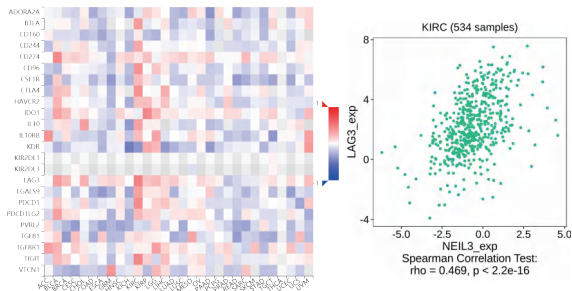

**B** Immunostimulator

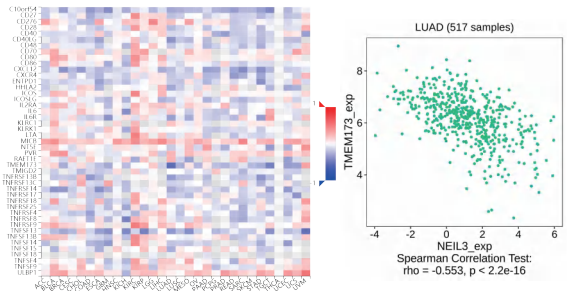

**C** MHC molecule

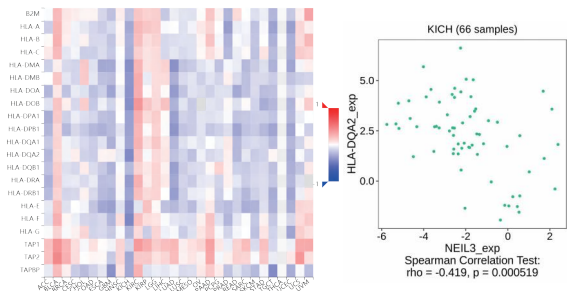

**D** Chemokine

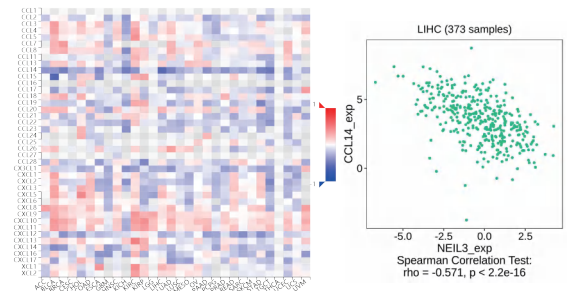

## E Chemokine Receptor

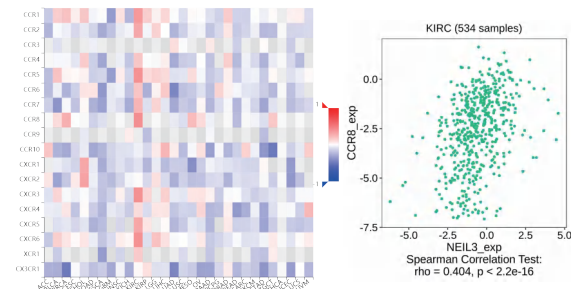

**F** Lymphocyte

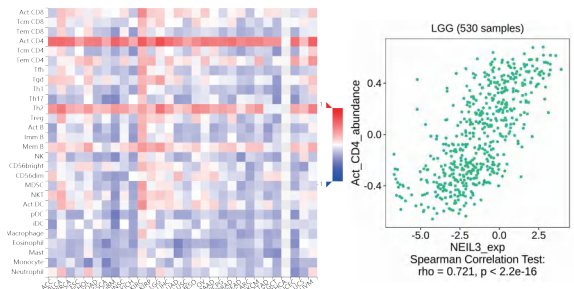

Supplement: s1 [file s1]
